# Supplementary material for: Recent advances in optical sensors for microcystin-LR: from recognition elements to signal transduction
Source: Royal Society of Chemistry journal article supplement (doi:10.1039/d4an01576b), 2025-01-01
Supplement: d4an01576b1.pdf [file d4an01576b1.pdf]

## Supporting information

### Recent advance in optical sensors for microcystin-LR: from recognition elements to signal transduction

Heng Dai<sup>a,1</sup>, Jun Liu<sup>b,1</sup>, Shanlin Wang<sup>c</sup>, Bin Wang<sup>a</sup>, Tianhan Kai<sup>a</sup>, Pian Wu<sup>a\*</sup>, Ping Ding<sup>a\*</sup>

<sup>a</sup> *Xiangya School of Public Health, Central South University, Changsha, Hunan, 410013, China*

<sup>b</sup> *University of South China, Hengyang, Hunan, 421001, China*

<sup>c</sup> *Guangzhou Customs District, Guangzhou, Guangdong, 510470, China*

<sup>1</sup> Heng Dai and Jun Liu contributed equally to this work.

\*Corresponding authors: [wupian@csu.edu.cn](mailto:wupian@csu.edu.cn) (P, Wu), [pingshui@csu.edu.cn](mailto:pingshui@csu.edu.cn) (P, Ding).

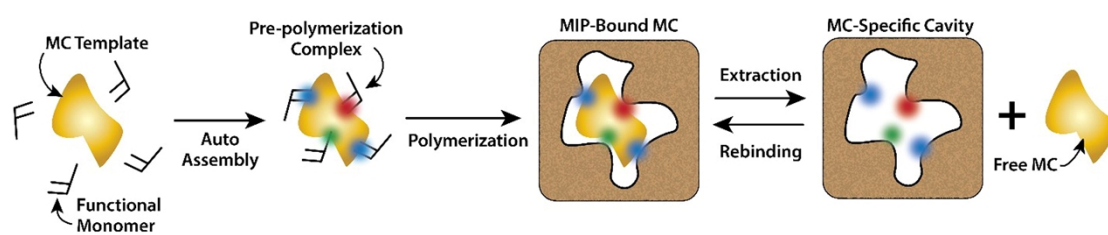

**Fig. S1.** Fundamental steps involving the synthetic imprinting of a polymer to form a MIP.<sup>1</sup>

**Reference:**

1. P. Fernando, M. W. Glasscott, K. Pokrzywinski, B. M. Fernando, G. K. Kosgei and L. C. Moores, *Crit. Rev. Anal. Chem.*, 2022, **52**, 1244-1258.
